# Supplementary material for: Predicting One-Year Mortality after Discharge Using Acute Heart Failure Score (AHFS)
Source: MDPI journal article supplement (doi:10.3390/jcm13072018), 2024-03-30
Supplement: s1 [file s1]

## Supplementary Data

Supplementary Table S1: Multivariate regression analysis for one-year mortality

| variables                                                      | unit | n   | OR_CI            | pglobal |
|----------------------------------------------------------------|------|-----|------------------|---------|
| Non ischemic etiology                                          |      | 117 | 0.31 [0.10–0.98] | 0.0469  |
| Intermediate-severe mitral regurgitation                       |      | 112 | 3.37 [1.26–9.00] | 0.0156  |
| Soluble suppression of tumorigenicity 2 (sST2)                 | 100  | 117 | 2.20 [1.26–3.82] | 0.0053  |
| Age                                                            | 5    | 117 | 1.23 [0.99–1.53] | 0.0557  |
| Previous Heart Failure hospitalisation                         |      | 117 | 2.51 [0.98–6.38] | 0.0541  |
| N-terminal prohormone of brain natriuretic peptide (NT-proBNP) | 1000 | 117 | 1.04 [1.00–1.07] | 0.0515  |
| Serum Creatinine                                               | 100  | 117 | 1.65 [0.93–2.94] | 0.0884  |
| Glomerular Filtration Rate (GFR)                               | 10   | 117 | 0.81 [0.64–1.02] | 0.0674  |
| Serum total Bilirubin                                          | 10   | 101 | 1.31 [0.99–1.74] | 0.0627  |
| Hemoglobin (Hb)                                                | 10   | 116 | 0.22 [0.03–1.89] | 0.1696  |

Supplementary Table S2: 6 variables model

| Variables                                              | unit    | n   | OR_IC            | pglobal |
|--------------------------------------------------------|---------|-----|------------------|---------|
| Soluble suppression of tumorigenicity 2 (sST2) (ng/mL) | 100.0   | 117 | 1.37 [0.88–2.13] | 0.1700  |
| Serum Bilirubin                                        | 10.0000 | 101 | 1.32 [0.98–1.77] | 0.0648  |
| Age                                                    | 5.0000  | 117 | 1.15 [0.98–1.35] | 0.0881  |
| Moderate-severe mitral regurgitation<br>Yes vs. No     |         | 112 | 2.17 [0.99–4.74] | 0.0527  |
| Previous HF hospitalisation<br>Yes vs. No              |         | 117 | 2.71 [1.24–5.93] | 0.0122  |
| Ischemic etiology<br>Yes vs. No                        |         | 117 | 0.53 [0.23–1.22] | 0.1359  |
